# Supplementary material for: Measurements of gaseous mercury exchanges at the sediment–water, water–atmosphere and sediment–atmosphere interfaces of a tidal environment (Arcachon Bay, France)
Source: Royal Society of Chemistry journal article supplement (doi:10.1039/c0em00358a), 2011-01-01
Supplement: c0em00358a.pdf [file c0em00358a.pdf]

Table SI-1

Range of average wind speed,  $k_{Hg}$ , saturation ratio and gaseous Hg water-atmosphere fluxes obtained for the three different stations and seasons

|                        |    | Wind speed <sup>a</sup><br>(m s <sup>-1</sup> ) | $k_{Hg}$ <sup>b</sup><br>(cm h <sup>-1</sup> ) | Saturation<br>ratio | Gaseous Hg flux<br>(ng m <sup>-2</sup> h <sup>-1</sup> ) |
|------------------------|----|-------------------------------------------------|------------------------------------------------|---------------------|----------------------------------------------------------|
| <b>March 2005</b>      |    |                                                 |                                                |                     |                                                          |
| Muddy sediments        | S2 | 3.8                                             | 7.7                                            | 5 - 5               | 4.3 - 5.3                                                |
| Muddy with macrophytes | S3 | 3.2 - 5.7                                       | 6.4 - 12.6                                     | 3 - 13              | 4.2 - 11.6                                               |
| <b>May 2006</b>        |    |                                                 |                                                |                     |                                                          |
| Muddy sediments        | S2 | 3.7                                             | 10.5                                           | 6 - 12              | 1.5 - 3.2                                                |
| Muddy with macrophytes | S3 | 6.0 - 7.3                                       | 17.2 - 19.7                                    | 2 - 26              | 0.4 - 14.5                                               |
| Subtidal station       | S4 | 3.5 - 3.8                                       | 10.3 - 11.0                                    | 4 - 17              | 0.9 - 4.4                                                |
| <b>October 2007</b>    |    |                                                 |                                                |                     |                                                          |
| Muddy sediments        | S2 | 2.3 - 2.5                                       | 7.0 - 7.4                                      | 5 - 7               | 1.4 - 2.5                                                |
| Muddy with macrophytes | S3 | 3.0 - 4.4                                       | 8.6 - 11.7                                     | 4 - 20              | 1.5 - 13.5                                               |
| Subtidal station       | S4 | 2.9 - 3.3                                       | 8.5 - 10.1                                     | 5 - 9               | 1.7 - 4.7                                                |

a. Range of wind speed at 10 m (1-hour averaged) over the benthic chambers incubation periods

b.  $k_{Hg}$  calculated with the model of Borges et al., (2004) as a function of wind speed

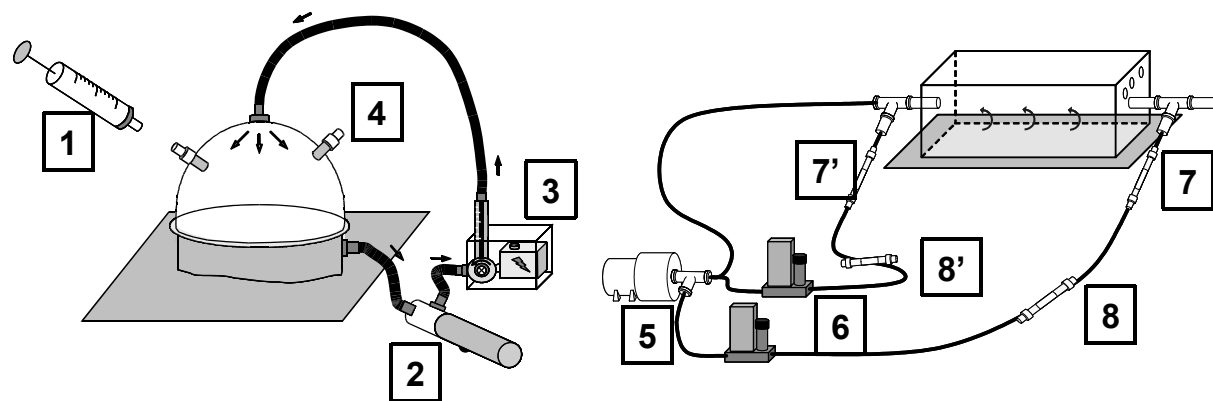

Figure SI-1. Schematic representation of benthic chamber (left) and dynamic flux chamber (right). 1. 450 mL PP syringe; 2. pH, O<sub>2</sub> and T probe; 3. battery and flowmeter; 4. tap; 5. vacuum pump; 6. mass flow controllers; 7 and 7': analytical inlet and outlet gold traps; 8 and 8': preventive gold traps

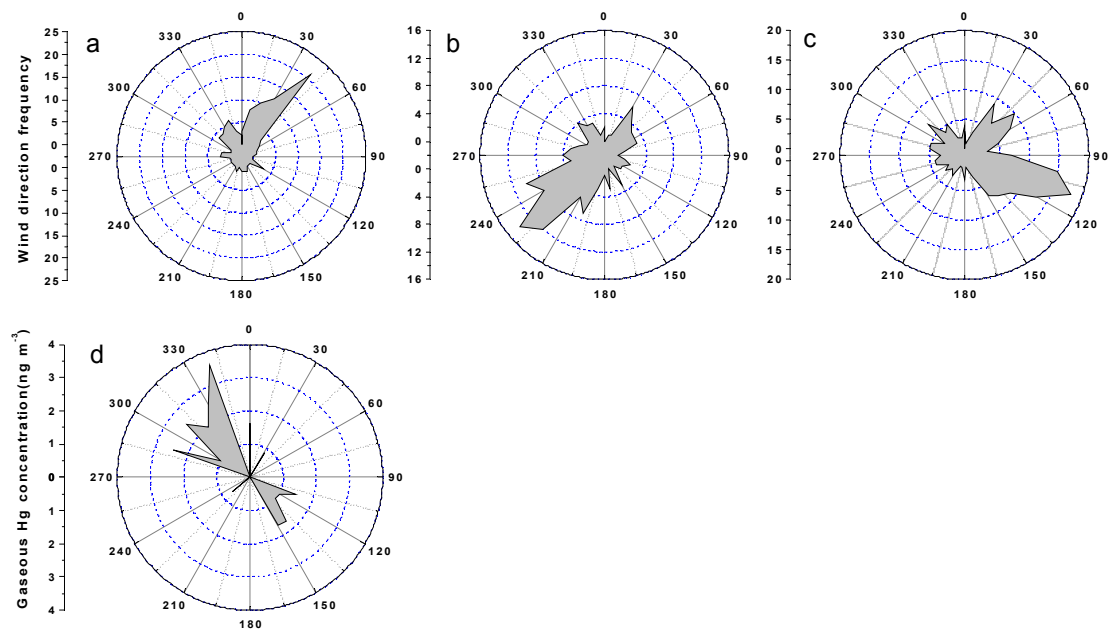

Figure SI-2. Compass roses for the three field campaigns a. March 2005; b. May 2006, c. October 2007 and d. mean gaseous Hg concentrations according to the wind directions averaged over the three campaigns

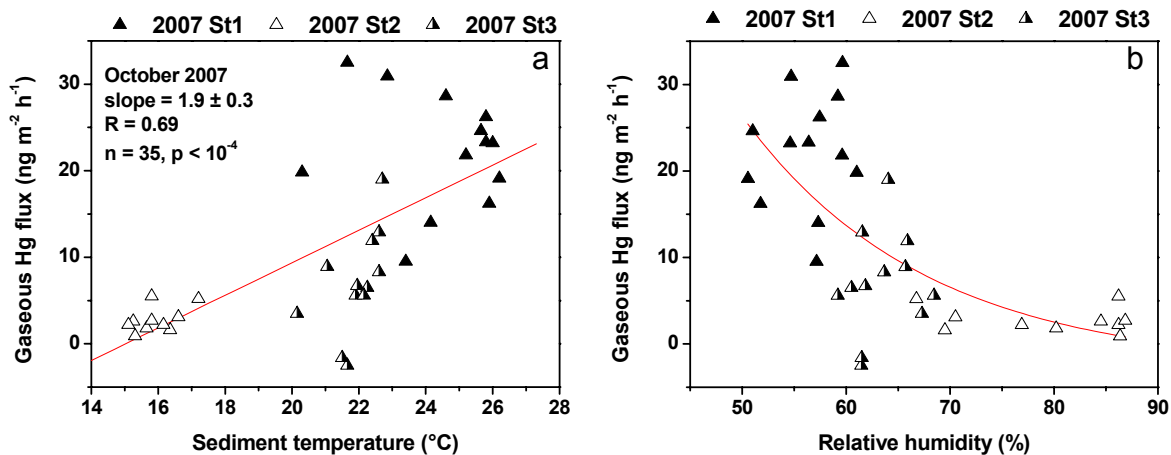

Figure SI-3. Specific relationships observed in October 2007 between sediment - atmosphere gaseous Hg fluxes and sediment temperature (a) and relative humidity (b)

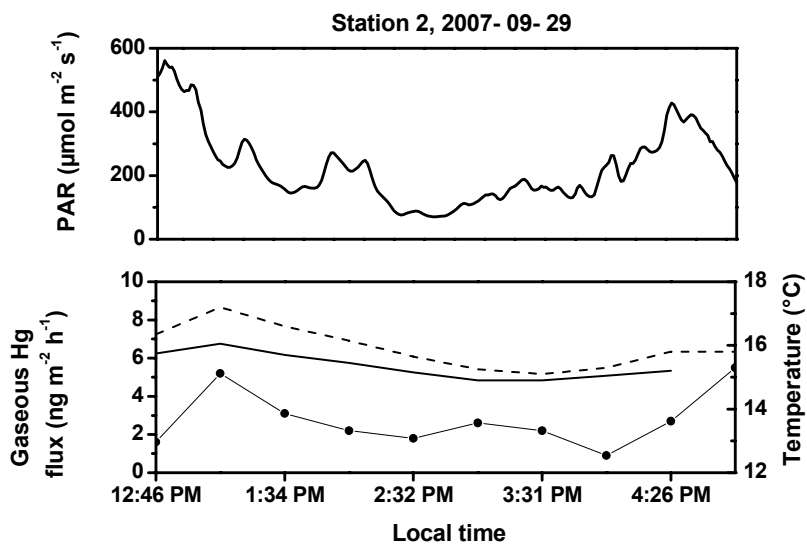

Figure SI-4. Example of time course evolution of gaseous Hg fluxes (circles), sediment (dashed line) and air (solid line) temperatures and PAR intensity on station 2 (intertidal mudflat without *Zostera noltii*) during the 2007 field campaign.
